# Supplementary material for: PLGA nanoparticle-reinforced supramolecular peptide hydrogels for local delivery of multiple drugs with enhanced synergism
Source: Royal Society of Chemistry journal article supplement (doi:10.1039/d0sm01152e), 2020-01-01
Supplement: d0sm01152e1.pdf [file d0sm01152e1.pdf]

# **PLGA Nanoparticle-Reinforced Supramolecular Peptide Hydrogels for Local Delivery of Multiple Drugs with Enhanced Synergism**

Can Wu,<sup>a</sup> Chunlu Wang,<sup>a</sup> Lu Sun,<sup>a</sup> Keming Xu,<sup>\*a</sup> Wenying Zhong,<sup>ab\*</sup>

*<sup>a</sup>Department of Chemistry, China Pharmaceutical University, Nanjing 210009, China.*

*<sup>b</sup>Key Laboratory of Biomedical Functional Materials, China Pharmaceutical University, Nanjing  
210009, China.*

## **Corresponding Author**

\*E-mail: wyzhong@cpu.edu.cn; \*E-mail: kmxu@cpu.edu.cn.

## Table of contents

**Fig. S1.** TOF-MS of Peptide (NapFFYRGD).

**Fig. S2.** HPLC spectrum of Peptide (NapFFYRGD).

**Fig. S3.** <sup>1</sup>H NMR spectrum of Peptide (NapFFYRGD).

**Fig. S4.** (A) Photograph of **Cis/Peptide@NP/Irino** hydrogel (0.2 eq./0.8 wt%@0.5 wt%) that was injected with a syringe using a 25-gauged needle; (B) Photograph of "CPU" that was written using the hydrogel with a syringe using a 25-gauged needle.

**Fig. S5.** The profiles of average fluorescence density of RhB over time after the mice were subcutaneously injected with RhB solution, NP(RhB)/Irino or Cis/Peptide@NP(RhB)/Irino hydrogel.

**Fig. S6.** Viabilities of A549 cells after 48 h treatment of Peptide and blank NP with various concentrations.

**Fig. S7.** TEM micrograph of **Cis/Peptide@NP/Irino** (0.2 eq./0.8 wt%@0.5 wt%) that was further diluted to 125 µg/mL for peptide (arrows indicate short nanofibers of ~ 500 nm).

**Fig. S8.** CLSM images of A549 cells after 4 h treatment of Cis/Peptide@NP(RhB)/Irino at 37 or 4 °C (0.2 eq./0.8 wt%@0.5 wt%, diluted to a final concentration of 75 µg/mL for NP(RhB)). Red, NP-RhB/Irino; Blue, DAPI for staining the cell nucleus. Scale bar, 20 µm.

**Table S1.** The calculated parameters for Ritger-Peppas modeling of 192 h drug release of Cis from various hydrogel formulations.

**Table S2.** The calculated parameters for Ritger-Peppas modeling of 192 h drug release of Irino from various hydrogel formulations.

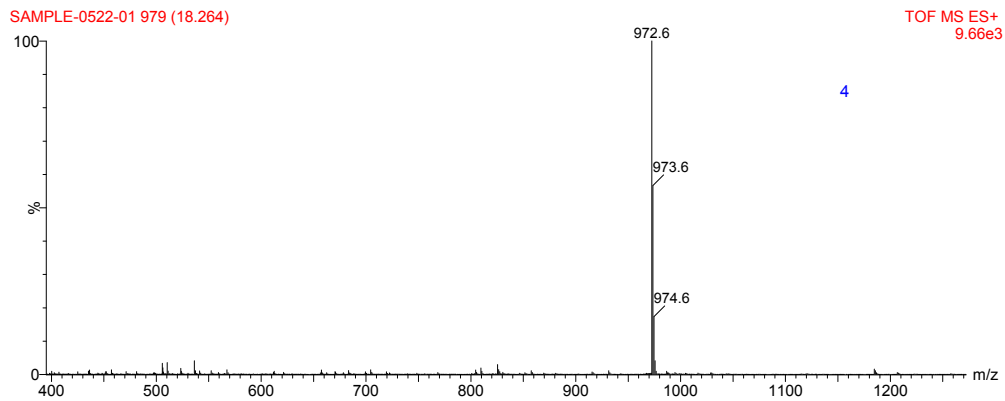

**Fig. S1.** TOF-MS of Peptide (NapFFYRGD). (ESI-MS:  $C_{51}H_{57}N_9O_{11}$ , cal.MW = 972, obsvd.  $[M]^+$  = 972.6  $[M+H]^+$  = 973.6,  $[M+2H]^+$  = 974.6.

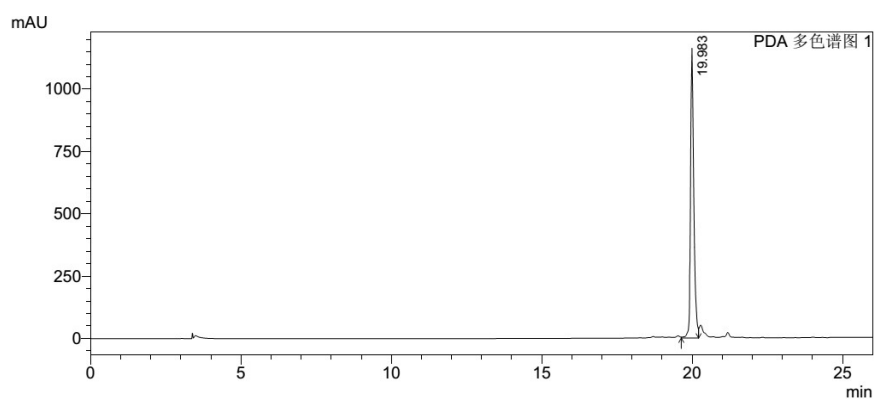

**Fig. S2.** HPLC spectrum of Peptide (NapFFYRGD).

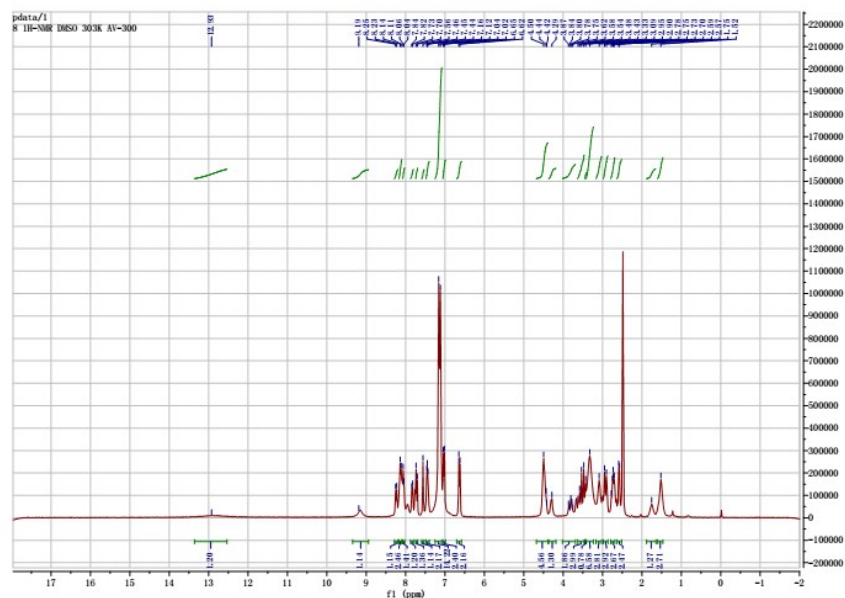

**Fig. S3.**  $^1H$  NMR spectrum of Peptide (NapFFYRGD).  $^1H$ -NMR, 300 MHz, ( $[D_6]$  DMSO)  $\delta$  = 12.93 (s, 1 H), 9.19 (s, 1 H), 8.25-8.23 (d, 1 H,  $J$  = 6 Hz), 8.14-8.11 (d, 2 H,  $J$  = 9 Hz), 8.06-8.04 (d, 1 H,  $J$  = 6 Hz), 7.84-7.82 (d, 1 H,  $J$  = 6 Hz), 7.84-7.82 (d, 1 H,  $J$  = 6 Hz), 7.73-7.70 (d, 1 H,  $J$  = 9 Hz), 7.46-7.44 (m, 2 H), 7.16-7.12 (d, 14 H,  $J$  = 12 Hz), 7.04-7.02 (d, 2 H,  $J$  = 6 Hz), 6.65-

6.62 (d, 2 H, J = 9 HZ), 4.50-4.42 (m, 5 H), 4.29 (s, 1 H), 3.87-3.75 (m, 2 H), 3.62-3.48 (m, 2 H), 3.43 (s, 1 H), 3.33 (s, 6 H), 3.09 (s, 2 H), 2.95-2.90 (d, 2 H, J = 15 HZ), 2.78-2.70 (m, 2 H), 2.59-2.57 (d, 2 H, J = 6 HZ), 1.75 (s, 1 H), 1.52 (s, 2 H).

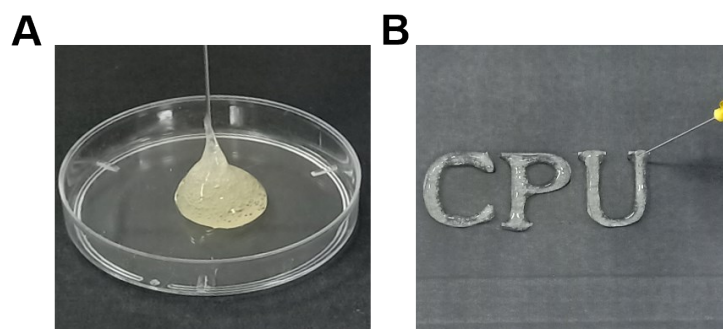

**Fig. S4.** (A) Photograph of Cis/Peptide@NP/Irino hydrogel (0.2 eq./0.8 wt% @ 0.5 wt%) that was injected with a syringe using a 25-gauged needle; (B) Photograph of “CPU” that was written using the hydrogel with a syringe using a 25-gauged needle.

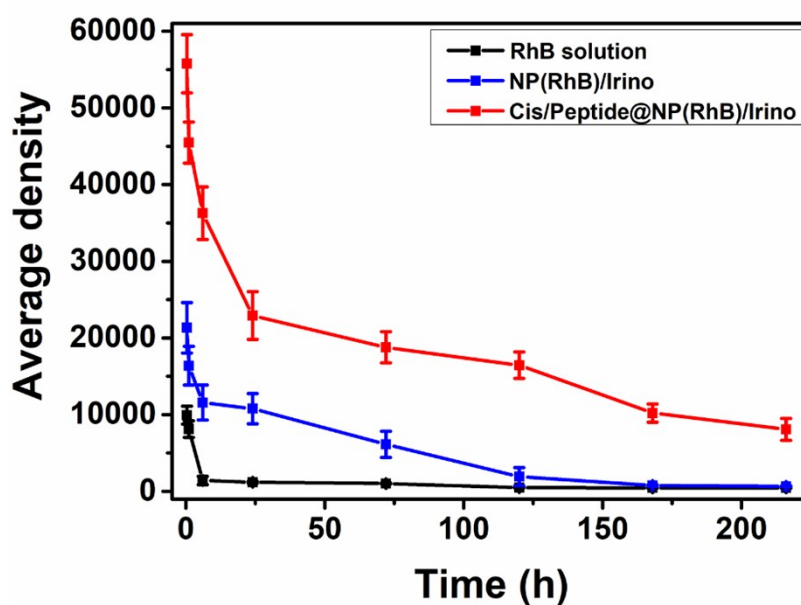

**Fig. S5.** The profiles of average fluorescence density of RhB over time after the mice were subcutaneously injected with RhB solution, NP(RhB)/Irino or Cis/Peptide@NP(RhB)/Irino hydrogel.

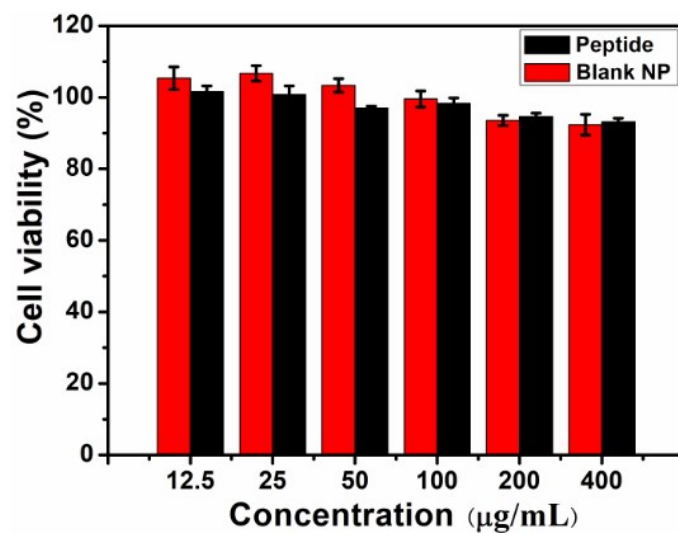

**Fig. S6.** Viabilities of A549 cells after 48 h treatment of Peptide and blank NP with various concentrations.

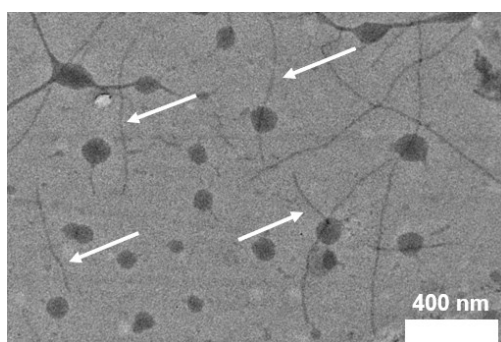

**Fig. S7.** TEM micrograph of Cis/Peptide@NP/Irino (0.2 eq./0.8 wt%@0.5 wt%) that was further diluted to 125 µg/mL for peptide (arrows indicate short nanofibers of ~ 500 nm)

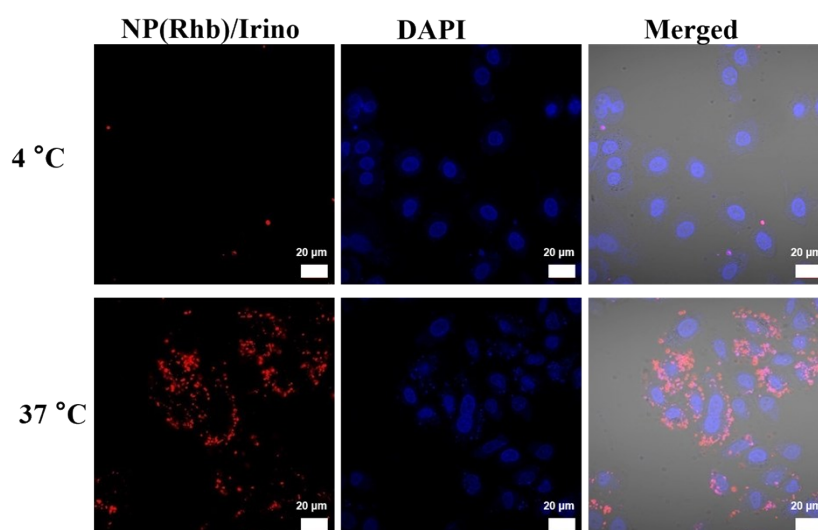

**Fig. S8.** CLSM images of A549 cells after 4 h treatment of Cis/Peptide@NP(RhB)/Irino at 37 or 4 °C (0.2 eq./0.8 wt%@0.5 wt%, diluted to a final concentration of 75 µg/mL for NP(RhB)). Red, NP-RhB/Irino; Blue, DAPI for staining the cell nucleus. Scale bar, 20 µm.

**Table S1.** The calculated parameters for Ritger-Peppas modeling of 192 h drug release of Cis from various hydrogel formulations.

|                                                        | n      | k      | R <sup>2</sup> |
|--------------------------------------------------------|--------|--------|----------------|
| Cis/Peptide (0.2 eq./0.8 wt%)                          | 0.7303 | 0.0252 | 0.9513         |
| <b>Cis/Peptide@NP/Irino</b> (0.2 eq./0.8 wt%@0.25 wt%) | 0.7125 | 0.0243 | 0.9686         |
| <b>Cis/Peptide@NP/Irino</b> (0.2 eq./0.8 wt%@0.5 wt%)  | 0.7274 | 0.0212 | 0.9672         |
| <b>Cis/Peptide@NP/Irino</b> (0.2 eq./0.8 wt%@1.0 wt%)  | 0.7358 | 0.0191 | 0.9612         |

**Table S2.** The calculated parameters for Ritger-Peppas modeling of 192 h drug release of Irino from various hydrogel formulations.

|                                                        | n      | k      | R <sup>2</sup> |
|--------------------------------------------------------|--------|--------|----------------|
| NP/Irino                                               | 0.5093 | 0.0535 | 0.9830         |
| <b>Cis/Peptide@NP/Irino</b> (0.2 eq./0.8 wt%@0.25 wt%) | 0.8095 | 0.0042 | 0.9833         |
| <b>Cis/Peptide@NP/Irino</b> (0.2 eq./0.8 wt%@0.5 wt%)  | 0.7732 | 0.0029 | 0.9597         |
| <b>Cis/Peptide@NP/Irino</b> (0.2 eq./0.8 wt%@1.0 wt%)  | 0.7347 | 0.0018 | 0.9509         |
